# Supplementary material
Source: publisher site journal article supplement (https://www.spandidos-publications.com/5321/downloadSupplementary)

Figure S1. Volcano map of differentially expressed genes. The abscissa  $\log_2\text{foldchange}$  represents the difference (Alzheimer's disease/normal) and the ordinate represents the confidence level  $[-\log_{10}(\text{adj. P. value})]$ . Each point in the figure represents a gene. The dashed lines on the horizontal and vertical axes represent the  $\log_2\text{foldchange}$  absolute threshold of 0.5 and P-value threshold of 0.05, respectively.

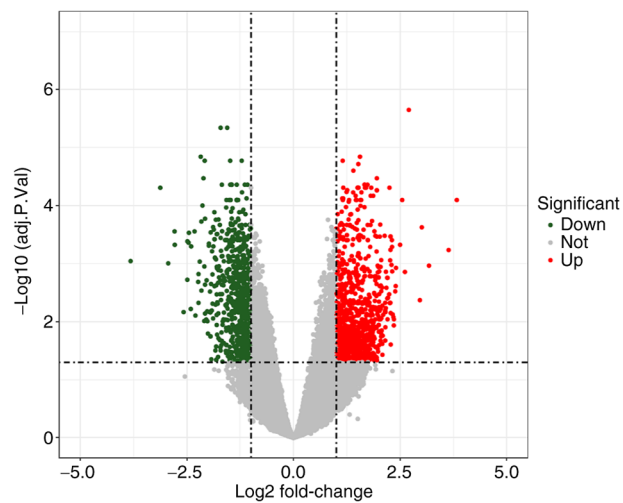

Figure S2. Heat map of 59 key targets in control and AD samples. Each square represents a gene. The greater the expression, the darker the color (red, upregulated; blue, downregulated expression). Each row represents the expression of each gene in different samples; each column represents the expression of all genes in each sample.

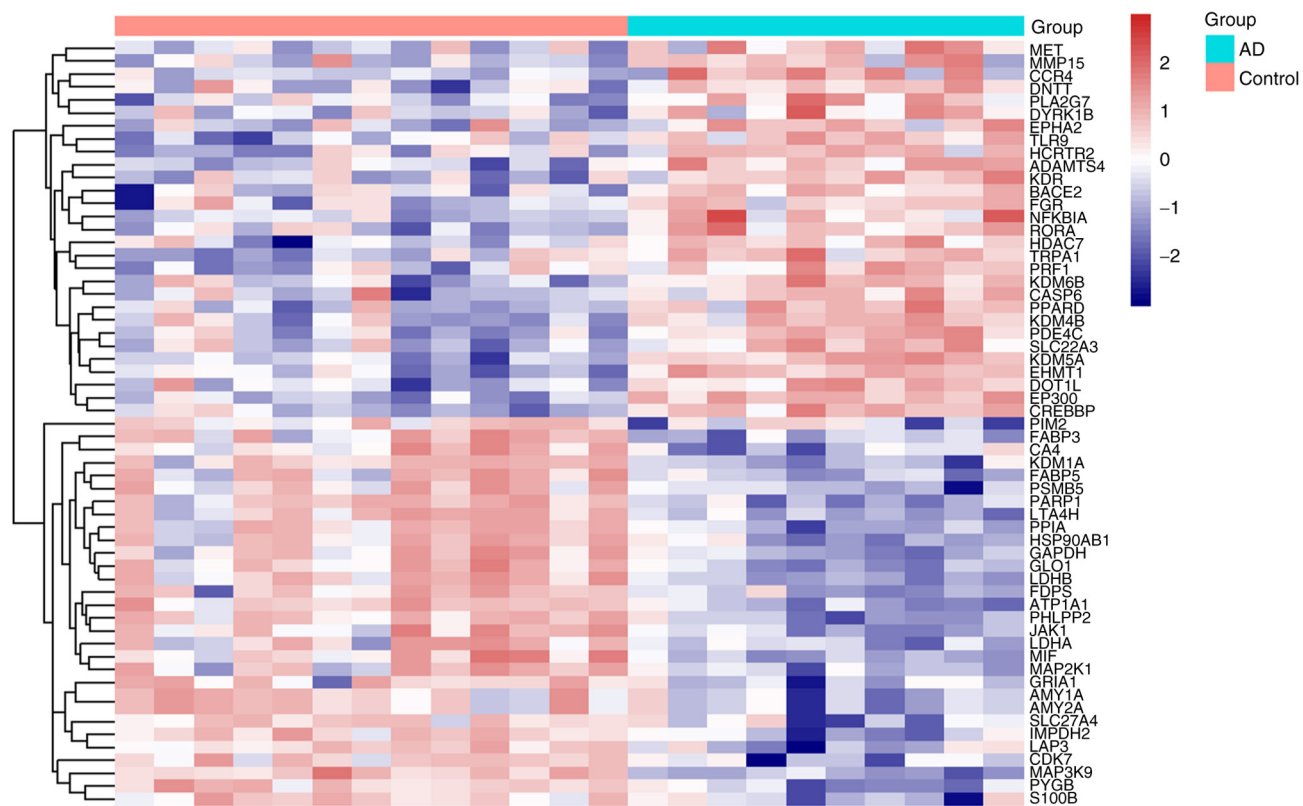

Supplement: Supplementary file 1 [file downloadSupplementary]
